# Supplementary material
Source: publisher site journal article supplement (https://studysites.sagepub.com/gribben/Web%20Material%20(Appendix)/Gribben_Web%20Material%20(Appendix)_Ch-05.pdf)
Supplement: Supplementary file 1 [file Gribben_Web%20Material%20(Appendix)_Ch-05.pdf]

## Appendix 5: Activity 7.4 Answers

---

|                                                                                                           |       |
|-----------------------------------------------------------------------------------------------------------|-------|
| I can add new information in the conclusion                                                               | False |
| I can't give my personal viewpoints in my assignments                                                     | False |
| I use quotation marks when quoting directly                                                               | True  |
| I can present longer quotations as separate paragraphs                                                    | True  |
| Longer quotations are usually more than three lines long                                                  | True  |
| I can write 'main body of discussion' as my heading                                                       | False |
| My main body of discussion is divided into different sections and sub-sections that contain paragraphs    | True  |
| I can use both numbers and letters at the same time when listing my appendices                            | False |
| References are works I've cited throughout my discussion                                                  | True  |
| One sentence can be considered a paragraph                                                                | False |
| My main body of discussion contains the main thrust of my arguments as well as my discussion of the topic | True  |
| My conclusion draws together all the main points discussed in my assignment                               | True  |
| Bibliography is everything I've read as background information for my assignment topic                    | True  |

---
